# Supplementary material
Source: PubMed Central journal article supplement (PMC3699860)
Supplement: NIHMS475446-supplement-2.pdf [file NIHMS475446-supplement-2.pdf]

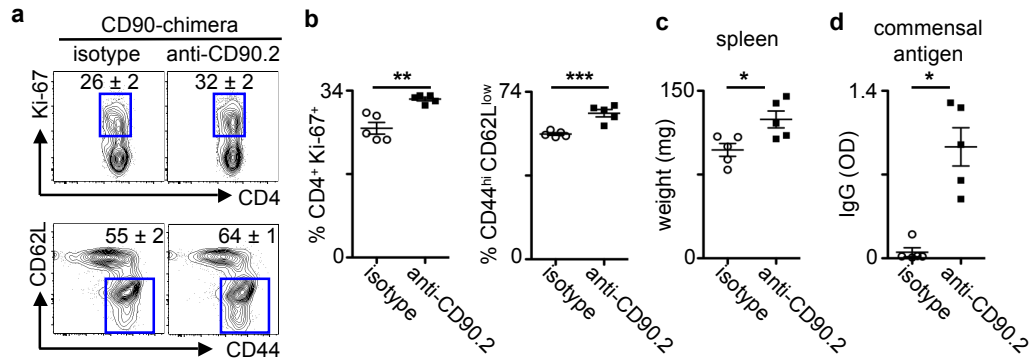

**Figure S1. Experimental depletion of innate lymphoid cells results in dysregulated adaptive immune cell responses to commensal bacteria.**

**a-d**, Defined age- and sex-matched CD90-disparate mouse chimeras were continuously treated with anti-CD90.2 monoclonal antibody for 14 days and examined for the frequency of splenic Ki-67<sup>+</sup> CD4<sup>+</sup> T cells (top) and CD44<sup>high</sup> CD62L<sup>low</sup> CD4<sup>+</sup> T cells (bottom) (**a**), quantified frequencies of splenic Ki-67<sup>+</sup> CD4<sup>+</sup> T cells (left) and CD44<sup>high</sup> CD62L<sup>low</sup> CD4<sup>+</sup> T cells (right) (**b**), spleen weight (**c**) and relative optical density (OD) values of serum IgG specific to commensal bacteria (**d**). Flow cytometry plots are gated on live CD4<sup>+</sup> CD3<sup>+</sup> T cells (**a**). Data are representative of 2 independent experiments containing 3-5 mice per group. Results are shown as the means  $\pm$  s.e.m. \*  $p < 0.05$ , \*\*  $p < 0.01$ , \*\*\*  $p < 0.001$  (two-tailed students *t*-test).

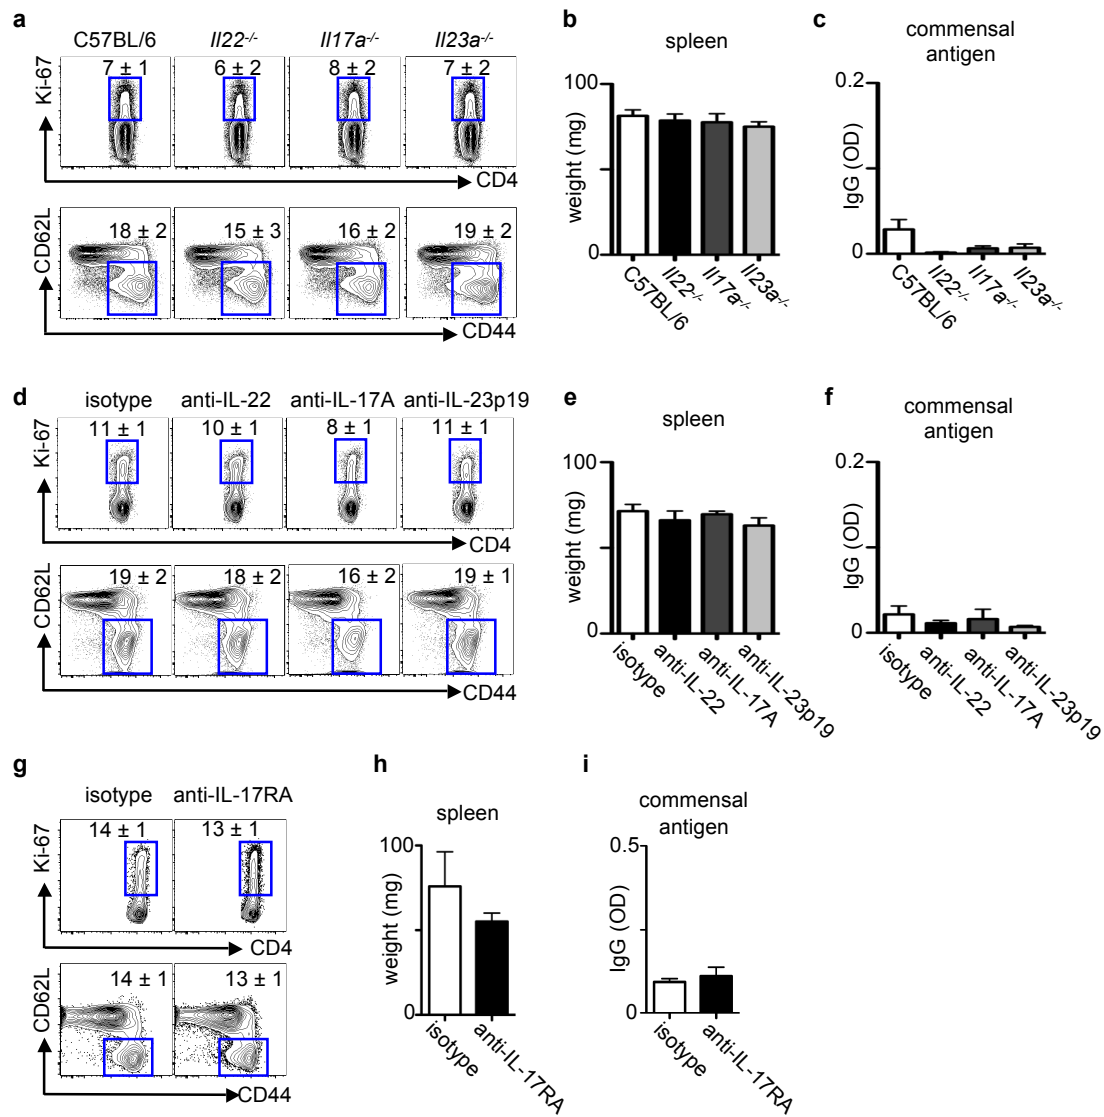

**Figure S2. Genetic deletion or experimental blockade of IL-22, IL-17A, IL-23p19 or IL-17RA does not result in dysregulated adaptive immune cell responses to commensal bacteria.** a-c, Defined age- and sex-matched control and cytokine-deficient mice, or C57BL/6 mice that were continuously treated with monoclonal antibodies for 14 days, were examined for the frequency of splenic Ki-67<sup>+</sup> CD4<sup>+</sup> T cells (top) and CD44<sup>high</sup> CD62L<sup>low</sup> CD4<sup>+</sup> T cells (bottom) (a,d,g), spleen weight (b,e,h) and relative optical density (OD) values of serum IgG specific to commensal bacteria (c,f,i). Flow cytometry plots are gated on live CD4<sup>+</sup> CD3<sup>+</sup> T cells (a,d,g). Data are representative of 2 independent experiments containing 3-5 mice per group. Results are shown as the means ± s.e.m.

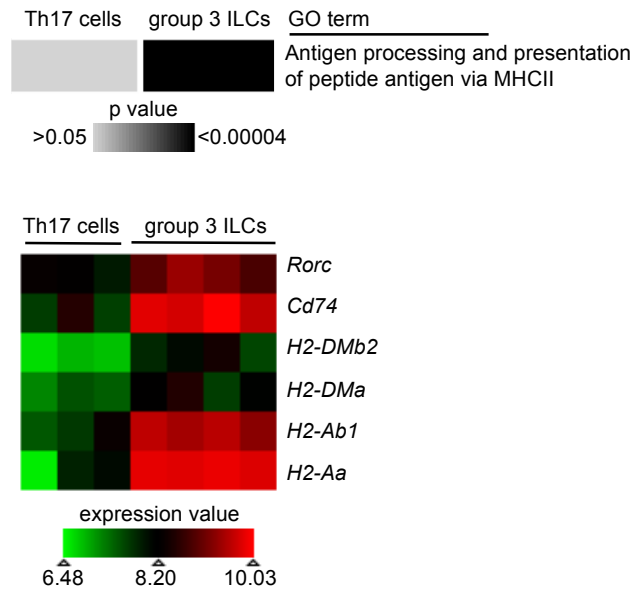

**Figure S3. ROR $\gamma$ <sup>+</sup> group 3 innate lymphoid cells are enriched in MHCII-associated gene transcripts as compared to ROR $\gamma$ <sup>+</sup> T helper 17 cells.** DAVID pathway analysis of GO terms enriched in the transcriptional profiles of *in vitro* differentiated Th17 cells and group 3 ROR $\gamma$ <sup>+</sup> ILCs (top) and heat map of selected lymphoid-associated and MHCII-associated gene transcripts (bottom).

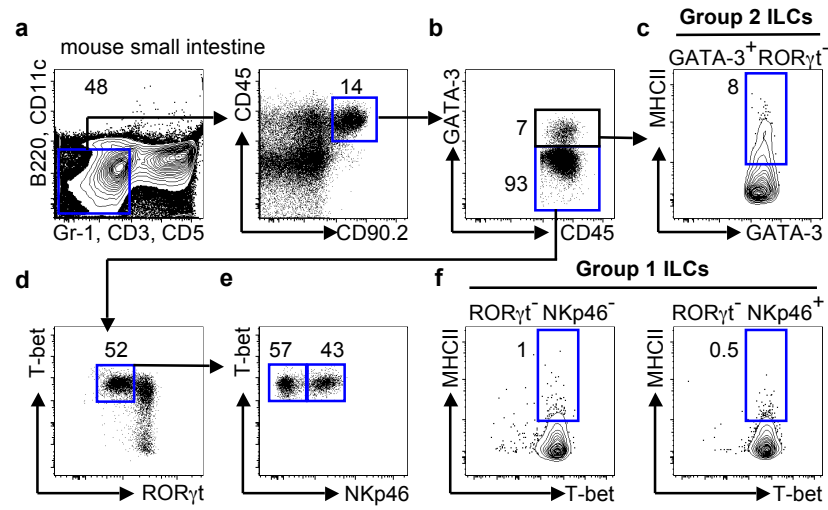

**Figure S4. Expression of MHCII on group 1 and group 2 ILCs.** **a-f**, Gating strategy to identify total Lineage<sup>-</sup> ILCs (**a**), group 2 ILCs (**b**) and group 1 ILCs (**d,e**). Expression of MHCII in GATA-3<sup>+</sup> group 2 ILCs (**c**) and T-bet<sup>+</sup> RORγt<sup>-</sup> group 1 ILCs subsets (**e,f**) in the small intestine of naive mice. Data are representative of 2 independent experiments containing 2-3 mice per group.

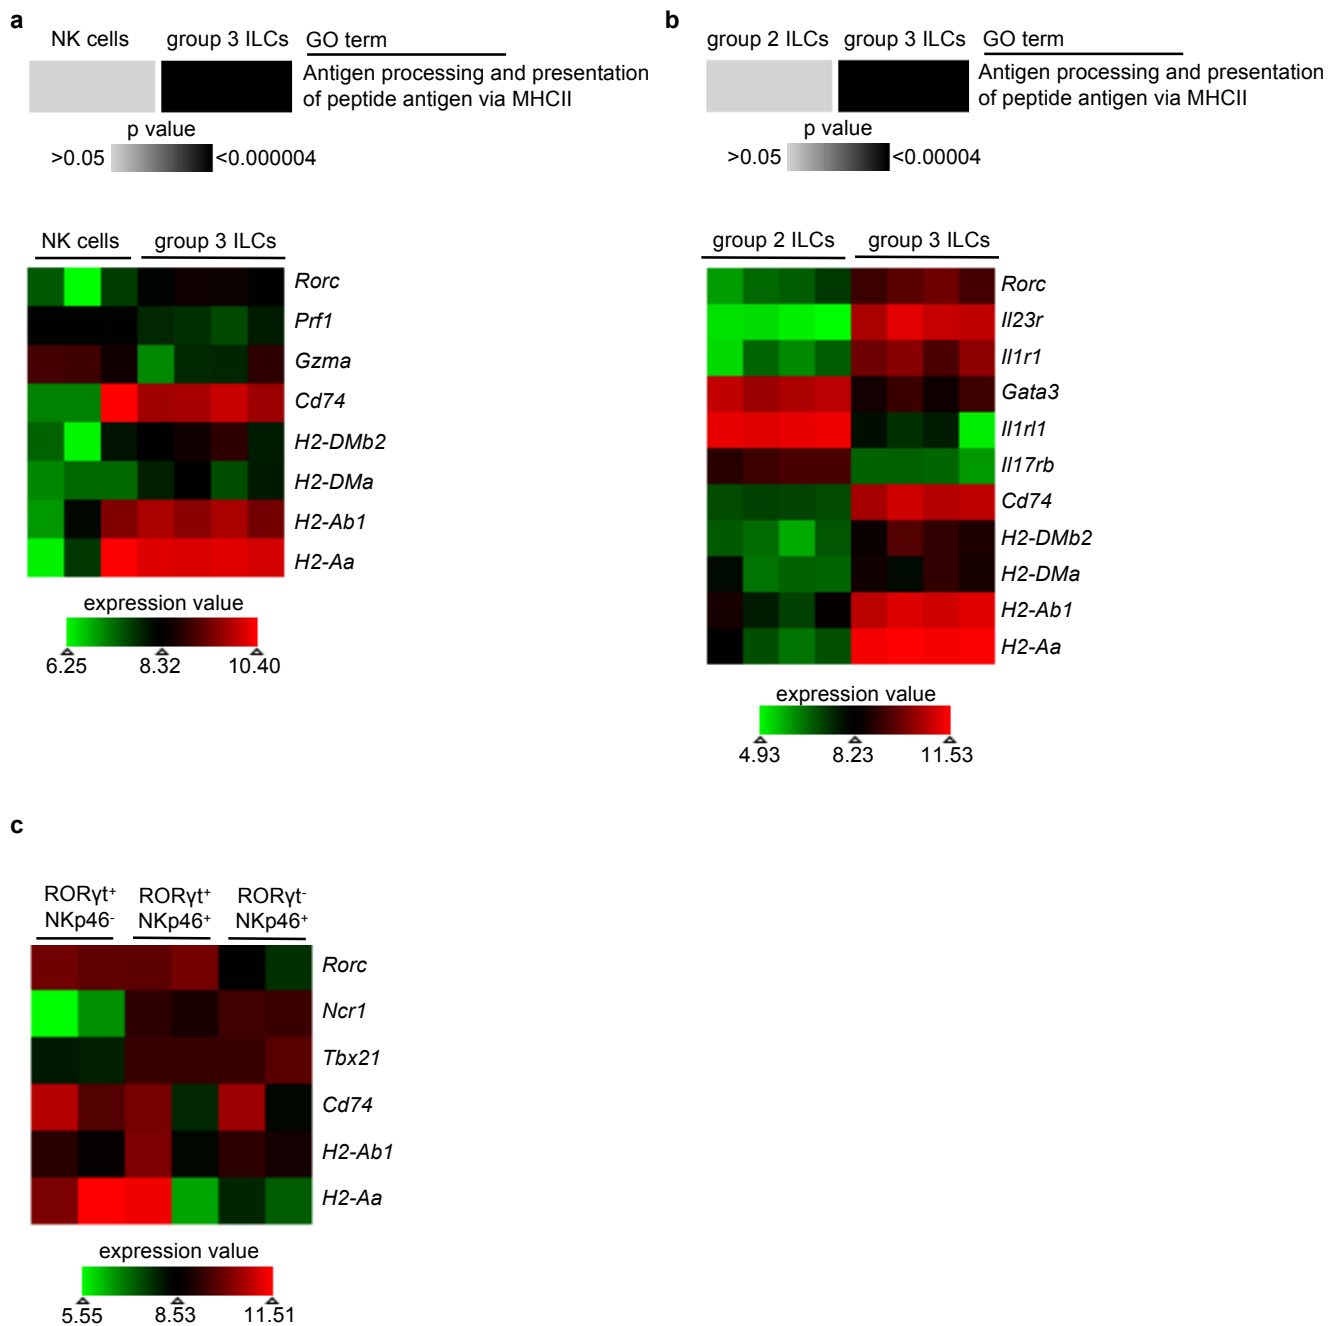

**Figure S5. T-bet<sup>-</sup> NKp46<sup>-</sup> RORyt<sup>+</sup> ILCs are enriched in MHCII-associated gene transcripts as compared group 1, group 2 and T-bet<sup>+</sup> NKp46<sup>+/−</sup> RORyt<sup>+</sup> ILCs.** **a**, DAVID pathway analysis of GO terms enriched in the transcriptional profiles of splenic NK cells and group 3 RORyt<sup>+</sup> ILCs (top) and heat map of selected lymphoid-associated and MHCII-associated gene transcripts (bottom). **b**, DAVID pathway analysis of GO terms enriched in the transcriptional profiles of group 2 ILCs and group 3 RORyt<sup>+</sup> ILCs (top) and heat map of selected lymphoid-associated and MHCII-associated gene transcripts (bottom). **c**, Heat map of selected lymphoid-associated and MHCII-associated gene transcripts in the transcriptional profiles of ILC subgroups distinguished by RORyt and NKp46.

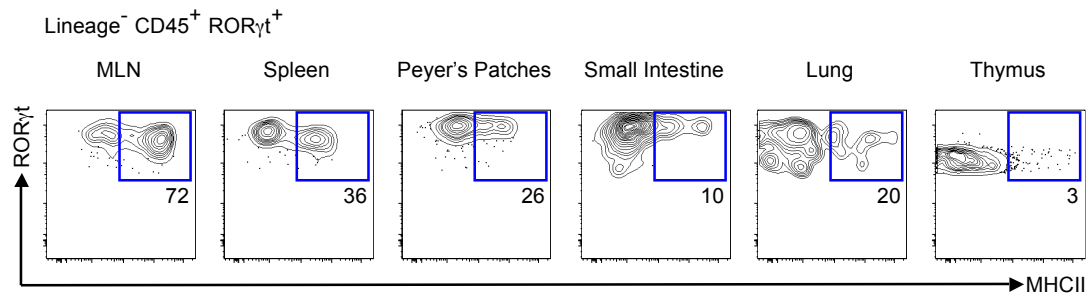

**Figure S6. MHCII expression is enriched in RORγt<sup>+</sup> ILCs in lymphoid tissues.** Lineage<sup>-</sup> CD45<sup>+</sup> RORγt<sup>+</sup> ILCs were examined for expression of MHCII in various lymphoid and mucosal tissues. Data are representative of 2 independent experiments containing 2-3 mice per group.

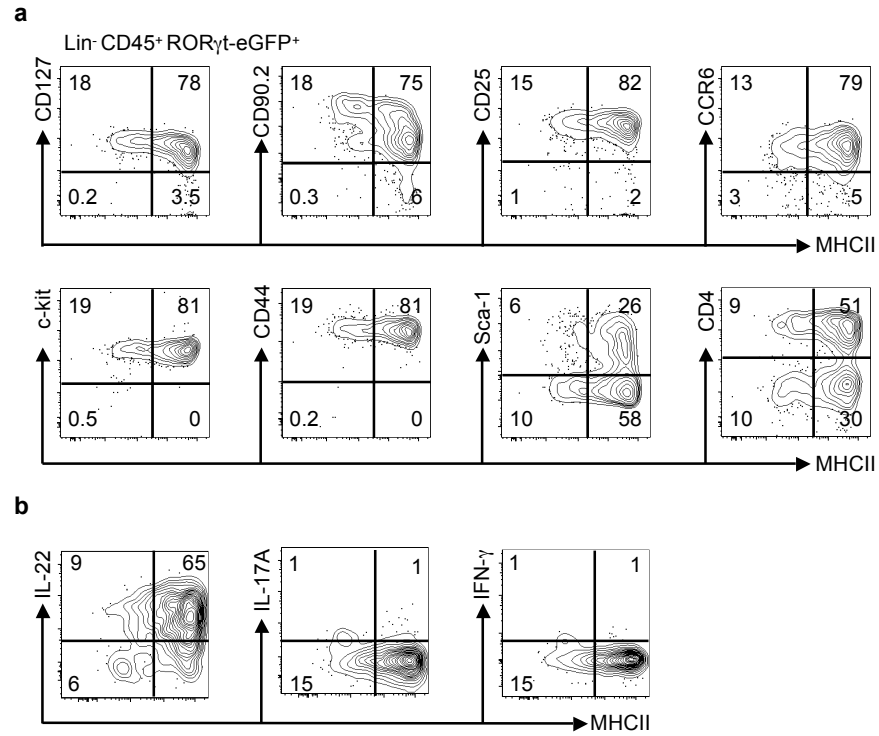

**Figure S7. Phenotypic analysis of MHCII<sup>+</sup> ROR $\gamma$ t<sup>+</sup> ILCs.** mLN cells from ROR $\gamma$ t-eGFP mice were gated as Lineage<sup>-</sup> CD45<sup>+</sup> ROR $\gamma$ t-eGFP<sup>+</sup> and expression of defined surface makers on MHCII expressing ILCs quantified (**a**). Expression of IL-22, IL-17A and IFN- $\gamma$  by MHCII<sup>+</sup> ILCs following 4 hours *ex vivo* restimulation with IL-23 (**b**). Data are representative of 2 independent experiments containing 2-3 mice per group.

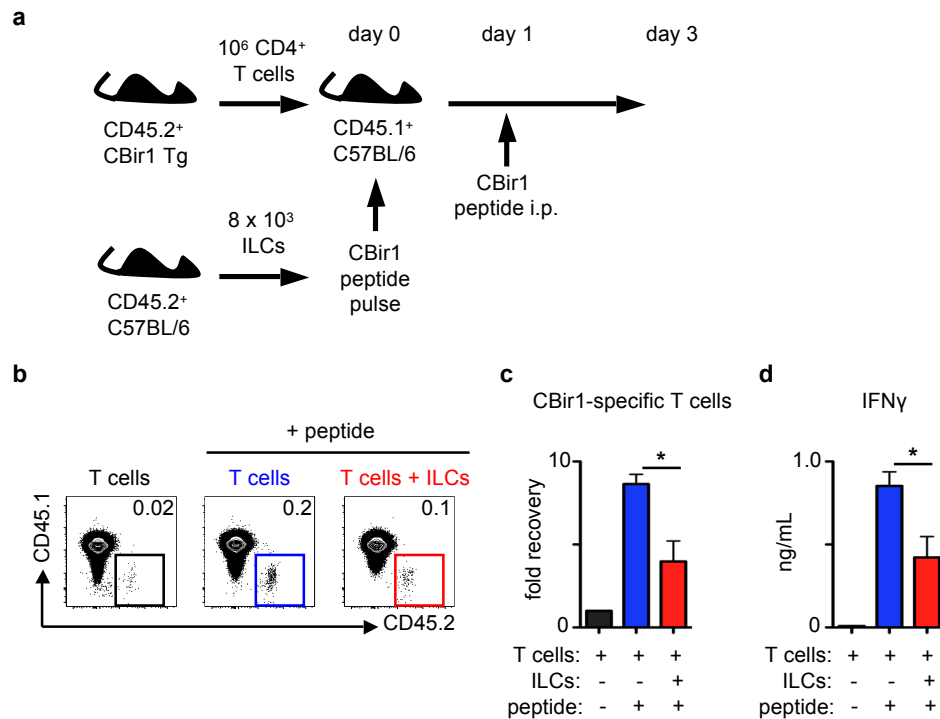

**Figure S8. ILC-T cell interactions limit the magnitude of T cell responses to commensal bacteria-specific antigens.** **a**, Sort-purified CBir1 TCR transgenic CD4<sup>+</sup> T cells were transferred into congenically marked hosts with or without co-transfer of sort-purified and CBir1 peptide pulsed ILCs. 24 hours later mice were systemically challenged with CBir1 peptide. **b-d** Three days following peptide challenge, recovery of total transgenic T cells from the spleen was quantified (**b,c**) and peptide-specific IFN- $\gamma$  production was quantified following *in vitro* restimulation (**d**). Data are representative of 2 independent experiments containing 2-3 mice per group. Results are shown as the means  $\pm$  s.e.m. \*  $p < 0.05$  (two-tailed students *t*-test).

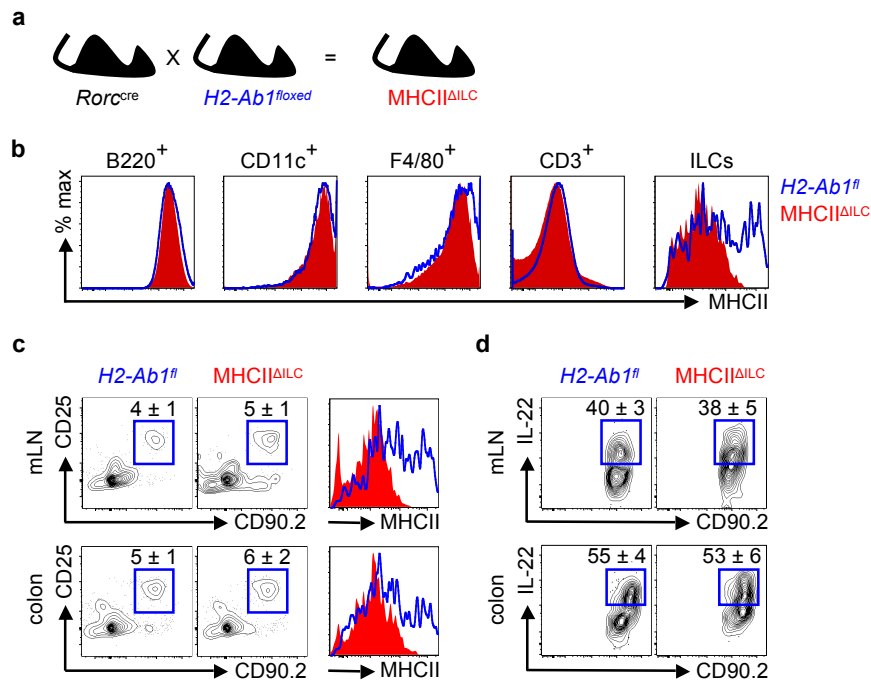

**Figure S9. Deletion of RORγt<sup>+</sup> innate lymphoid cell-intrinsic MHCII does not alter ILC frequency or cytokine production.**

**a, b,** Mouse strains crossed to generate MHCII<sup>ΔILC</sup> mice (**a**) and expression of MHCII in gated populations in the mLN of control *H2-Ab1<sup>floxed</sup>* mice (blue) or MHCII<sup>ΔILC</sup> mice (red) (**b**). **c, d,** *H2-Ab1<sup>floxed</sup>* mice or MHCII<sup>ΔILC</sup> mice were examined for the frequency of lineage<sup>-</sup> CD90.2<sup>+</sup> CD25<sup>+</sup> ILCs (**c**) and IL-22<sup>+</sup> ILCs (**d**). Flow cytometry plots are gated on Lineage<sup>-</sup> CD90.2<sup>+</sup> CD25<sup>+</sup> ILCs (**c,d**). Data are representative of 2 independent experiments containing 3-5 mice per group. Results are shown as the means ± s.e.m.

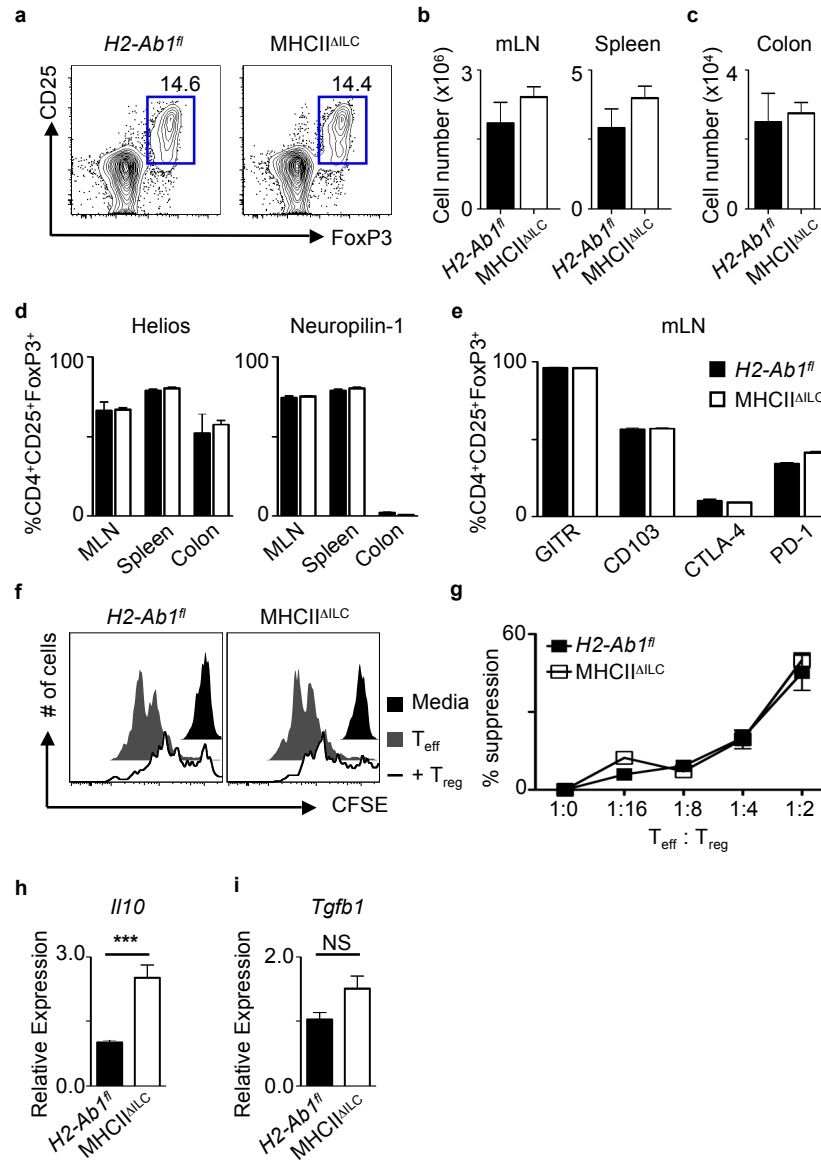

**Figure S10. Deletion of RORγt<sup>+</sup> innate lymphoid cell-intrinsic MHCII does not alter the frequency, phenotype or function of CD4<sup>+</sup> CD25<sup>+</sup> FoxP3<sup>+</sup> regulatory T cells.** **a-c**, *H2-Ab1<sup>fl</sup>* mice or *MHCII<sup>ΔILC</sup>* mice were examined for the frequency (**a**) and total cell number of CD4<sup>+</sup> CD25<sup>+</sup> FoxP3<sup>+</sup> T cells in the mLN and spleen (**b**) and colon (**c**). Flow cytometry plots are gated on live CD3<sup>+</sup> CD4<sup>+</sup> T cells in the mLN (**a**). **d,e** Expression of Helios and Neuropilin-1 in various tissues (**d**) and GITR, CD103, CTLA-4 and PD1 in the mLN (**e**) were quantified on CD4<sup>+</sup> CD25<sup>+</sup> FoxP3<sup>+</sup> T cells. **f,g**, Sort-purified CD4<sup>+</sup> CD25<sup>+</sup> CD45RB<sup>lo</sup> regulatory T cells (>98% FoxP3<sup>+</sup>) were added to sort-purified CFSE-labeled effector T cells (CD4<sup>+</sup>, CD25<sup>+</sup>, CD45RB<sup>hi</sup>) in the presence of purified CD11c<sup>+</sup> DCs and soluble anti-CD3 (**f**) and CFSE dilution was quantified (**g**). **h,i** *H2-Ab1<sup>fl</sup>* mice or *MHCII<sup>ΔILC</sup>* mice were examined for expression levels of *Il10* (**h**) or *Tgfb1* (**i**) in the colon. NS, not significant. Data are representative of 2 independent experiments containing 1-3 mice per group or 2-4 *in vitro* replicates. Results are shown as the means +/- s.e.m. \*\*\* p < 0.001 (two-tailed students *t*-test).

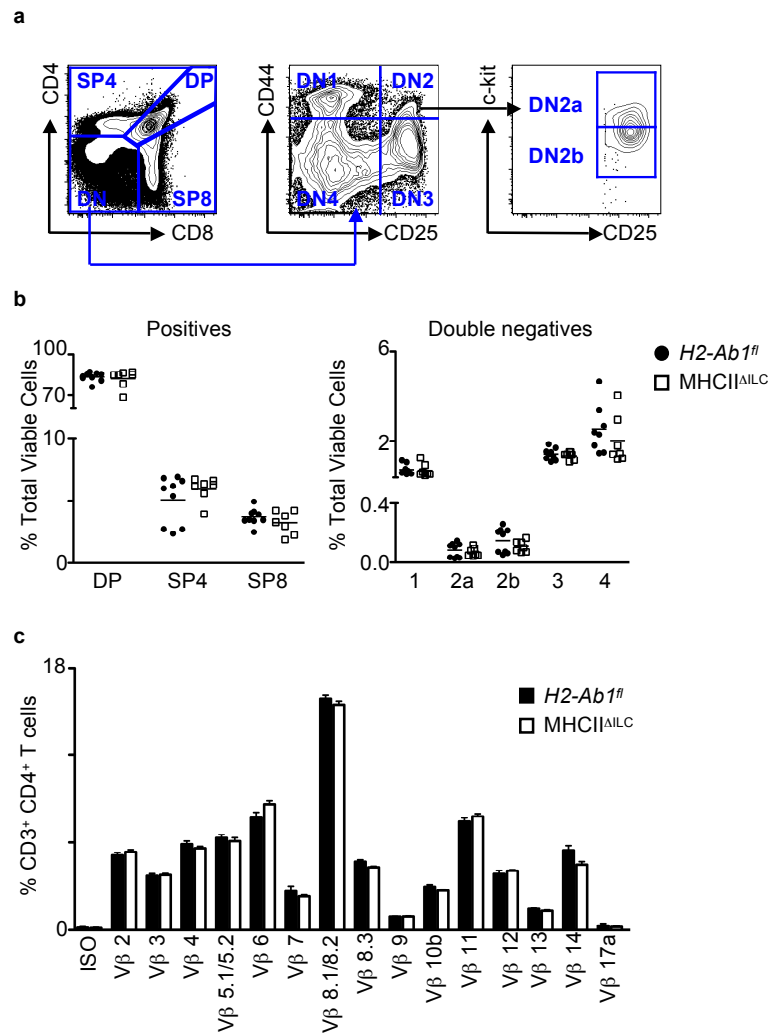

**Figure S11. Thymic selection is not affected by the deletion of ILC-intrinsic MHCII.** Defined age- and sex-matched mouse strains were examined for thymocyte maturation and peripheral TCR usage. **a-c**, Gating strategy to identify stages of thymocyte development (**a**). *H2-Ab1<sup>fl</sup>* mice or MHCII<sup>ΔILC</sup> mice were examined for the frequency of thymocytes at different stages of development (**b**). Expression of TCR  $\nu\beta$  chains in splenic CD4<sup>+</sup> T cells (**c**). Data are representative of 2 independent experiments containing 2-3 mice per group. Results are shown as the means  $\pm$  s.e.m.

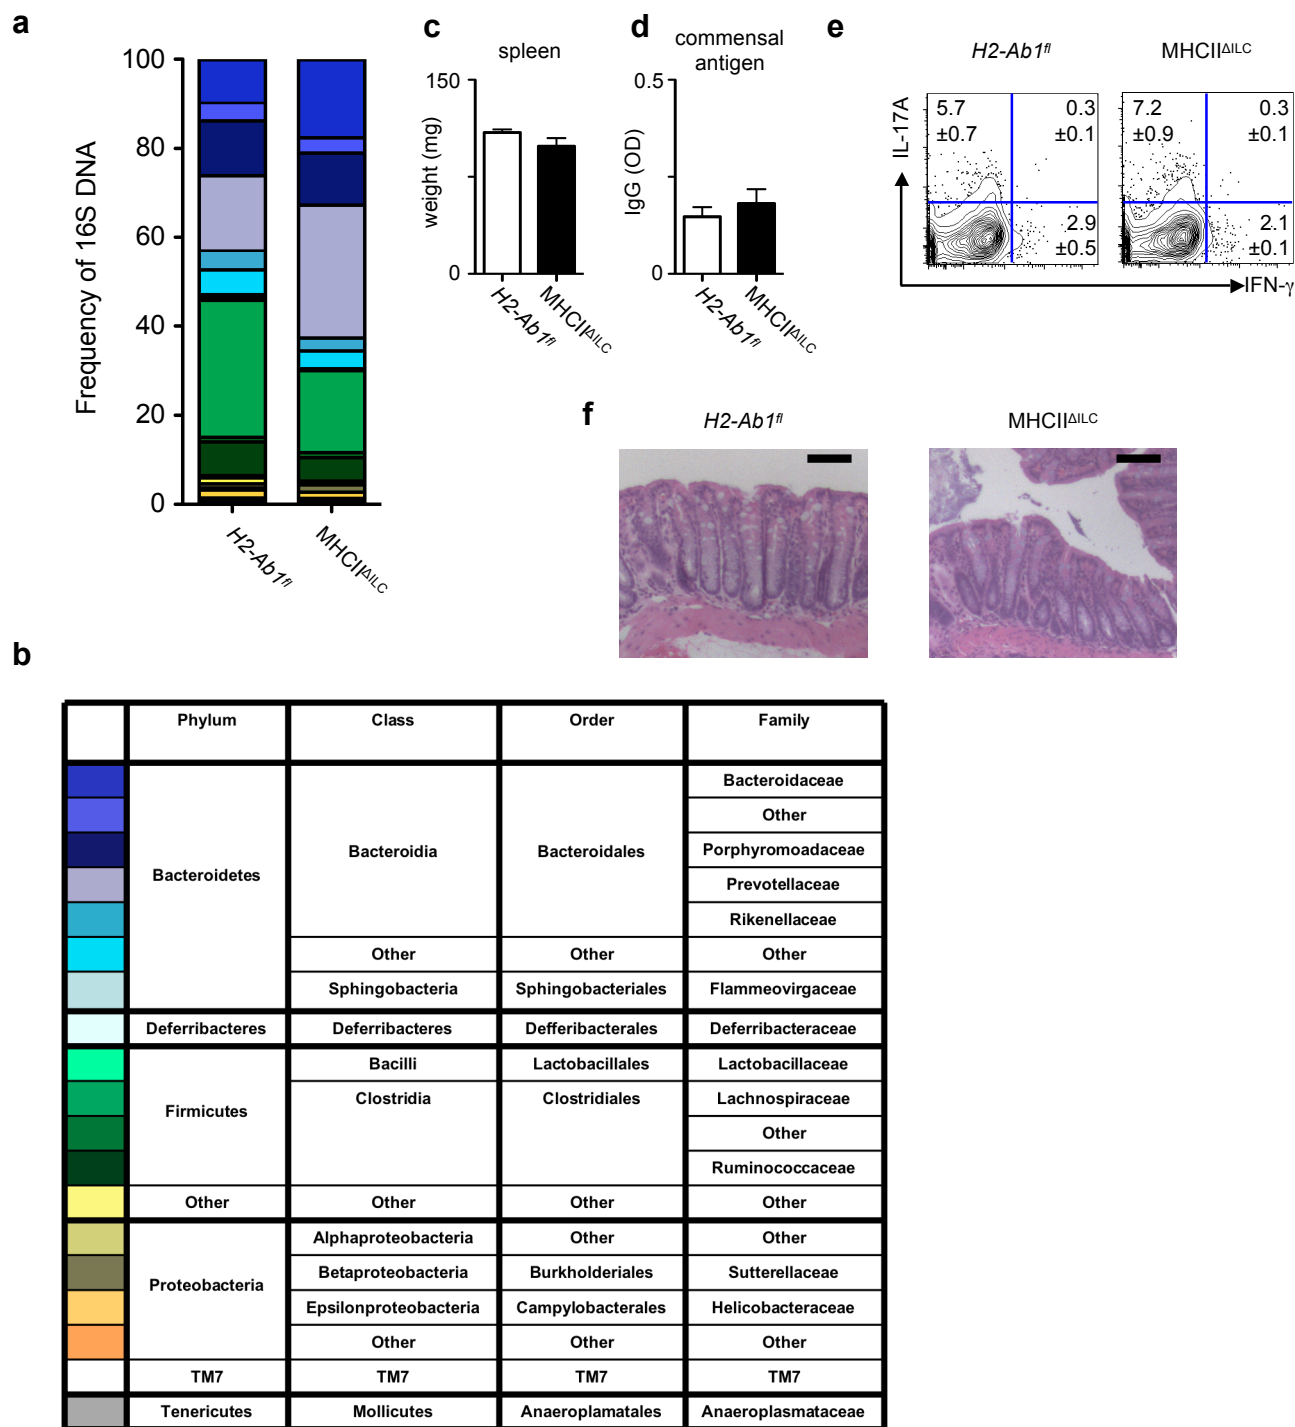

**Figure S12. Intestinal inflammation is not the result of dysbiosis in the absence of ROR $\gamma$ <sup>+</sup> innate lymphoid cell-intrinsic MHCII.** The composition of the intestinal microbiota was examined in defined age- and sex-matched co-housed mouse strains. **a-f** Relative abundance of family-level commensal bacteria obtained from 16S pyrosequencing of the luminal colonic contents of age-matched littermate *H2-Ab1<sup>flxed</sup>* mice and MHCII $\Delta$ ILC mice (**a**) and list of detected bacterial families (**b**). Transfer of cecal contents from littermate *H2-Ab1<sup>flxed</sup>* mice and MHCII $\Delta$ ILC mice to germ free mice via oral gavage and assessment of splenic weight (**c**), commensal bacteria antigen-specific serum IgG (**d**), CD4<sup>+</sup> T cell cytokine production (**e**) and colon histology (**f**) 6 weeks following transfer. Data are representative 5 mice per group. Results are shown as the means  $\pm$  s.e.m.

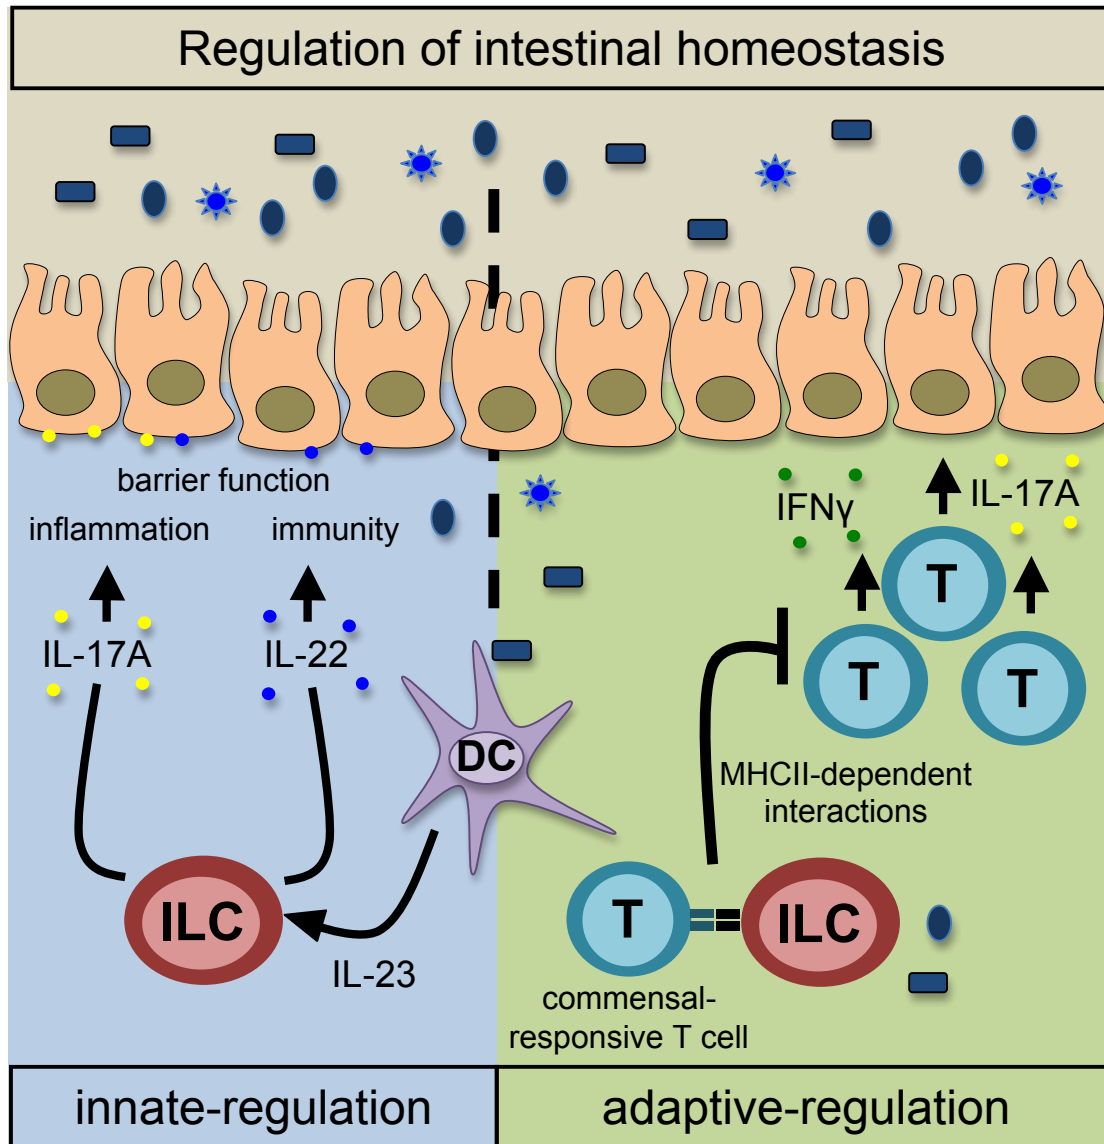

**Figure S13. Innate lymphoid cells orchestrate intestinal homeostasis through regulation of innate and adaptive immune cell responses.** Previous studies have identified that ILCs can influence intestinal homeostasis through innate cytokine-mediated regulation of intestinal epithelial cells. Production of IL-17A and IL-22 can act on intestinal epithelial cells to promote inflammation, innate immunity and regulate intestinal barrier function. In addition this report identifies that ILCs can modulate CD4<sup>+</sup> T cell responses to commensal bacteria through expression of MHCII. ILC-intrinsic MHCII limits the development of pathologic commensal bacteria-responsive CD4<sup>+</sup> T cells to orchestrate intestinal homeostasis.
